# Supplementary material
Source: PubMed Central journal article supplement (PMC3147418)
Supplement: EC.05095-11_1.pdf [file EC.05095-11_1.pdf]

## Supplemental Table

**Supp Table 1 Primers used in this study**

| Name         | Sequence                                                                                  |
|--------------|-------------------------------------------------------------------------------------------|
| G3.3         | ATGTTGGACGAGTCGGAATC                                                                      |
| G2.1         | TGCCCTCCAGCATAGTCGAAG                                                                     |
| G2.2         | CATCTACTATATGTAAGTATACGGCCCC                                                              |
| V2*NAT1      | GTGGTGAAGGACCCATCCAG                                                                      |
| V3*NAT1      | ACATGAGCATGCCCTGCCCC                                                                      |
| DYN1-DEL5    | CAGACTAAGATCGCAGAACGGCATTGGAAGGGCAAACACGGGAGCTGAAGATGACCGATGATCAGGCTAGGG<br>ATAACAGGGTAAT |
| DYN1-DEL3    | CTAACATACAAAAAGCAAAAGACTGGTGAGTACTGGAGGTATGGACATTACACTCAGTGAATTAAGGCATG<br>CAAGCTTAGATCT  |
| DYN1-IN5     | GATCGACTCCTGCTTCGCC                                                                       |
| DYN1-IN3     | CGAGTTGGCAGGACTCCG                                                                        |
| DYN1-VER5    | GACCAGAGCGAGGCCACG                                                                        |
| DYN1-VER3    | GTCGCTATTCAGTACATAGTC                                                                     |
| DYN1-130-NS1 | ACAAGAGACATGTAAGCAGCATAGCGCAAGAGCCTTAAATCACCTCCAGTGAATTCGAGCTCGG                          |
| DYN1-180-NS1 | CCCCGATTTCAACACCCTTGTTAGAAAGAGGTAAACAGATCACCACCAGTGAATTCGAGCTCGG                          |
| DYN1PR-DELF2 | CGACGTGCGGTTGTCTGCCGCGTAGCACACCATCACGATGTCCACACCATGATTACGCCAAGCTTGC                       |
| DYN1-PROM-G1 | GTATCGCCGTGTTGAACACG                                                                      |
| DYN1-PROM-G4 | CTCTTGATCCACCCGTTCCG                                                                      |
| DYN1-PROM-I1 | CAATGCCGTCTGCGATCTT                                                                       |
| DYN1-PROM-I2 | TCGCAGAACGGCATTGGAAG                                                                      |
| DYN1-TAG5    | TGCAAAAAAATCATCCAGACCAATGGCCCCACATCTTTAATTCACGGTGACGGTGCTGGTTTA                           |
| DYN1-TAG3    | AAAAAAGCAAAAGACTGGTGAGTACTGGAGGTATGGACATTACACCATGATTACGCCAAGCTTGC                         |
| DYN1-IN3     | CATGGCGGAACAGGACCTCA                                                                      |
| DYN1-IN3-SEQ | CTACGCTCACGAGGCCAG                                                                        |
| PAC1-DEL5    | AAAAAGTGGAACTCTATTATCCGGTTGCACCGCAAGATCCTTGATGCTAGGGATAACAGGGTAAT                         |
| PAC1-DEL3    | CAAACCTTTAAACATTGTCTGTGACGAGATCCCAACATCGAATTAGGCATGCAAGCTTAGATCT                          |
| PAC1-IN5     | GTAATCGCTTCCAGAACGC                                                                       |
| PAC1-VER5    | GGAGTGCGACGCCACGC                                                                         |
| PAC1-VER3    | TGAAACATCACTGTGACCCG                                                                      |
| PAC11-DEL5   | CGGTTTGACGGGCTCAACGGCAAGTGGTGAAGCGGTCAGGTTACGCCAGTGAATTCGAGCTCGG                          |
| PAC11-DEL3   | GAACGCACGGAAGACGATCTATAAAGGGAAATAAGGTGAAAGCCACATGATTACGCCAAGCTTGC                         |
| PAC11-IN5    | CGCCTTCTCGTACGTAATC                                                                       |
| PAC11-IN3    | AGTGGGCTACCTTATCTG                                                                        |
| PAC11-VER5   | TGTAGTATCCCGGTCCAG                                                                        |
| PAC11-VER3   | CGCCCATCTTACTAAGTG                                                                        |
| DYN2-DEL5    | ATCCACTCTTCACCAGAGCATAACAAGCCAATTCAACAGTTCAAGAAAACGACGGCCAGTGAATTC                        |
| DYN2-DEL3    | GCCGCGCTAGTAACACTGCCACCTATCTACTACTTACCTGCCGCCATGATTACGCCAAGCTTGC                          |
| DYN2-VER5    | TCCGCCGTGTCTACTTCTGC                                                                      |
| DYN2-VER3    | CGAGAAGTATCCCGTCCAG                                                                       |
| DYN2-IN5     | CGCTGCTGCTGTCAGTAGAC                                                                      |
| DYN2-IN3     | ACTTCTACATTGGACCGCTA                                                                      |
| JNM1-DEL5    | GCTATATTACAACGTTCAACCCACACTAGCAGTAAGAGCCTCAAAAAACGACGGCCAGTGAATTCG                        |
| JNM1-DEL3    | GGCATGCTTTAAGAGCTAACTATGTAATACGGAAGGCAGTAACGTCATGATTACGCCAAGCTTGC                         |
| JNM1-VER5    | AGAGGGCATCACCTGCTGTG                                                                      |
| JNM1-VER3    | GACTCGGTAGCACTGGCAAT                                                                      |
| JNM1-IN5     | CTATTTCCCTGCAGCTCCCGC                                                                     |
| JNM1-IN3     | TCAAGACCACCGACACCAAG                                                                      |

NDL1-DEL5 CTAAAGGCCACAAATACATAGAGAGCGGGAGCACAGCTAGGAGCCAAAACGACGGCCAGTGAATTCG  
NDL1-DEL3 GAAGCACCCCTTTCACAGCGTGCTGTAAGTAGGCTGTCCGCCATGCATGATTACGCCAAGCTTGC  
NDL1-VER5 GCAGAAAGGCAGAGTATGTG  
NDL1-VER3 CTATTGAGCGGAGGGTTGTT  
NDL1-IN5 GTAACGCTCTGATGACCGCC  
NDL1-IN3 GCGAGCAGAATGGGAACCTG  
NUM1-CTER-DEL5 CTGTGGACATGGGCATTTTCGTTAGCGACAGTCGCTTCTCTAAGCGAGCCAAGCATTATCCCCGCTTAAAAA  
CGACGGCCAGTGAATTCG  
NUM1-CTER-DEL3 AATCAAAGGCGTACAATTACATAATTATAAAATGCTCTCGTAGCTATGTCTTTCGGGCTTTTTTCATGATT  
ACGCCAAGCTTGC  
NUM1-CTER-VER5 GCCGCCTTCAACCCTATGTC  
NUM1-CTER-VER3 GGCTTTGGCCGATTAGAGTG  
NUM1-NTER-DEL5 AGGATACTCAACAAGTGGCTAGATCGCTCAGAACCAATAGCAGAGGAAAACGACGGCCAGTGAATTCGA  
NUM1-NTER-DEL3 GGTTCGCCTTTTCTGATAATGCTTCATACTCGGAGATAGTAATAACATGATTACGCCAAGCTTGC  
NUM1-NTER-VER5 AGCCTCGCTTGTGGTATC  
NUM1-NTER-VER3 AATGCTGCTGGAGCTTGG  
NUM1-NTER-IN5 CCGCTGTTGTTTCGAACCC  
NUM1-NTER-IN3 TTTGGTCCTGCGGATATGG
